# Supplementary material for: A Preliminary Investigation of Reversing RML: From an RDF dataset to its Column-Based data source
Source: Biodivers Data J. 2015 Jul 29;(3):e5464. doi: 10.3897/BDJ.3.e5464 (PMC4549646; doi:10.3897/BDJ.3.e5464)
Supplement: Supplementary material 1 — RML2CSV evaluationn [file biodiversity_data_journal-3-e5464-s001.xlsx]

## Sheet: Data Content
							csv1(o) - csv1(r)	csv2(o) - csv2(r)	csv3(o) - csv3(r)	csv4(o) - csv4(r)	csv5(o) - csv5(r)
							1	1	1	1	1
							Content Comparison between the original csv data source and the reversed one.

## Sheet: Columns Order
	Dataset 1
									Distance
	column	original	depth (Pre-Order)	depth (In-Order)	depth (Post-Order)	breadth
	datasetID	1	1	2	5	1			original - depth (Pre-Order)	original - depth (In-Order)	original - depth (Post-Order)	breadth
	language	2	2	1	1	2			0	2	4	0
	samplingID	3	3	4	4	3
	eventData	4	4	3	2	4
	filedNumber	5	5	5	3	5
				noi vogliamo visualizzare la distanza tra tutte queste permutazioni per capire quale di esse e' piu vicina a quella originale.
	Dataset2
	column	original	depth (Pre-Order)	depth (In-Order)	depth (Post-Order)	breadth
	datasetID	1	1	2	5	1			original - depth (Pre-Order)	original - depth (In-Order)	original - depth (Post-Order)	breadth
	language	2	2	1	1	2			1	4	6	0
	samplingID	3	3	4	4	3
	eventData	4	4	3	2	4
	filedNumber	5	5	5	3	5
	aaaa	6	6	8	8	6
	bbbb	7	8	7	7	8
	ccccc	8	7	6	6	7
	Dataset_3
	column	original	depth (Pre-Order)	depth (In-Order)	depth (Post-Order)	breadth
	datasetID	1	4	2	5	1			original - depth (Pre-Order)	original - depth (In-Order)	original - depth (Post-Order)	breadth
	language	2	7	1	1	5			13	7	8	11
	samplingID	3	1	4	4	12
	eventData	4	3	3	2	7
	filedNumber	5	10	5	3	3
	aaaa	6	2	8	8	9
	bbbb	7	12	7	7	4
	ccccc	8	5	6	6	2
	ddddd	9	11	9	12	6
	eeeee	10	6	11	9	11
	ffffffff	11	8	12	10	8
	gggggg	12	9	10	11	10
	Dataset_Bad
	column	original	depth (Pre-Order)	depth (In-Order)	depth (Post-Order)	breadth
	datasetID	1	4	2	5	1			original - depth (Pre-Order)	original - depth (In-Order)	original - depth (Post-Order)	breadth
	language	2	7	1	1	5
	samplingID	3	1	4	4	12
	eventData	4	3	3	2	7
	filedNumber	5	10	5	3	3
	aaaa	6	2	8	8	9
	bbbb	7	12	7	7	4
	ccccc	8	5	6	6	2
	ddddd	9	11	9	12	6
	eeeee	10	6	11	9	11
	ffffffff	11	8	12	10	8
	gggggg	12	9	10	11	10
									Distance
								Datasets	original - depth (Pre-Order)	original - depth (In-Order)	original - depth (Post-Order)	breadth
								csv 1	0	2	4	0
								csv 2	1	4	6	0
								csv 3	13	7	8	11
